# Supplementary material for: The statistics of identifying differentially expressed genes in Expresso and TM4: a comparison
Source: PubMed Central journal article supplement (PMC1513403; doi:10.1186/1471-2105-7-215), 2006-04-20
Supplement: 1471-2105-7-215-S2.pdf [file 1471-2105-7-215-S2.pdf]

## Genes Subjected to qRT-PCR

**Additional File 2.** Supplement to BMC Bioinformatics paper *The statistics of identifying differentially expressed genes in Expresso and TM4: a comparison*, by Allan A. Sioson, Shrinivasrao P. Mane, Pinghua Li, Wei Sha, Lenwood S. Heath, Hans J. Bohnert, and Ruth Grene, 2006.

**Supplementary Table 1:** Annotation of genes subjected to qRT-PCR and the functional categories represented. For verification of microarray results in Experiment 2, Li et al. [23] performed real-time quantitative reverse-transcriptase PCR (qRT-PCR) for selected genes — 55 in Col-0; 52 in Cvi-0; 59 in WS; 26 in Th.

---

| ANNOTATION OF QRT-PCR GENES |                                                                              |
|-----------------------------|------------------------------------------------------------------------------|
| AMINO ACID METABOLISM       |                                                                              |
| AT5GG5010                   | asparagine synthetase 2 (ASN2)                                               |
| CARBON METABOLISM           |                                                                              |
| AT1G09960                   | sucrose transporter / sucrose-proton symporter (SUT4)                        |
| AT1G12240                   | beta-fructosidase (BFRUCT4) / beta-fructofuranosidase / invertase, vacuolar  |
| AT1G22710                   | sucrose transporter / sucrose-proton symporter (SUC2)                        |
| AT1G35580                   | beta-fructofuranosidase / invertase / saccharase / beta-fructosidase         |
| AT1G43670                   | fructose-1,6-bisphosphatase / D-fructose-1,6-bisphosphate 1-phosphohydrolase |
| AT1G58180                   | carbonic anhydrase family protein / carbonate dehydratase family protein     |
| AT1G73110                   | ribulose bisphosphate carboxylase/oxygenase activase / RuBisCO activase      |
| AT1G73370                   | sucrose synthase / sucrose-UDP glucosyltransferase                           |
| AT2G21590                   | ADPglucose pyrophosphorylase Large subunit 3, APL3                           |
| AT2G31390                   | pfkB-type carbohydrate kinase family protein                                 |
| AT2G35840                   | sucrose-phosphatase 1 (SPP1)                                                 |
| AT3G01500                   | carbonic anhydrase 1, chloroplast / carbonate dehydratase 1 (CA1)            |
| AT3G06500                   | beta-fructofuranosidase / invertase / saccharase / beta-fructosidase         |
| AT3G29360                   | UDP-glucose 6-dehydrogenase                                                  |
| AT3G43190                   | sucrose synthase / sucrose-UDP glucosyltransferase                           |
| AT3G46970                   | Glucan phosphorylase (cytosolic), PHS2                                       |
| AT3G52340                   | sucrose-phosphatase 3b (SPP3b)                                               |
| AT4G03050                   | encodes a 2-oxoglutarate-dependent dioxygenase                               |
| AT4G09020                   | isoamylase / starch debranching enzyme                                       |

---

CONTINUED ON NEXT PAGE

---

ANNOTATION OF QRT-PCR GENES

---

AT4G26620 sucrose-related  
AT4G37870 phosphoenolpyruvate carboxykinase (ATP) / PEP carboxykinase / PEPCK  
AT4G39210 ADPglucose pyrophosphorylase Large subunit 4, APL4  
AT5G11110 SPS5a, sucrose-phosphate synthase -like protein  
AT5G22510 beta-fructofuranosidase / invertase / saccharase  
AT5G43450 1-aminocyclopropane-1-carboxylate oxidase  
AT5G51830 pfkB-type carbohydrate kinase family protein  
AT5G55900 sucrose-related

---

HORMONES

---

AT1G14920 gibberellin response modulator (GAI) (RGA2) / gibberellin-responsive modulator  
AT2G19590 1-aminocyclopropane-1-carboxylate oxidase / ACC oxidase

---

LIPID METABOLISM

---

AT5G01220 UDP-sulfoquinovose:DAG sulfoquinovosyltransferase / sulfolipid synthase (SQD2)

---

NUCLEIC ACIDS

---

AT2G30470 ABI3/VP1 family regulatory protein

---

SECONDARY METABOLISM

---

AT3G51240 naringenin 3-dioxygenase / flavanone 3-hydroxylase (F3H)  
AT5G16450 dimethylmenaquinone methyltransferase family protein

---

SIGNALING

---

AT2G19860 hexokinase 2 (HXK2)  
AT4G14110 COP9 signalosome subunit / CSN subunit (CSN8), CSN8, FUS7  
AT4G26080 ABI1 protein phosphatase ABI1  
AT4G29130 hexokinase 1 (HXK1)  
AT5G02290 serine/threonine-specific protein kinase NAK  
AT5G57050 ABI 2 protein phosphatase 2C

---

CONTINUED ON NEXT PAGE

---

ANNOTATION OF QRT-PCR GENES

---

STRESS

---

AT1G70290 TPS8, trehalose-6-phosphate synthase, putative

---

TRANSPORT

---

AT1G44100 amino acid permease 5

AT1G61800 glucose-6-phosphate/phosphate translocator

AT1G67940 ABC transporter family protein

AT1G71890 sucrose transporter / sucrose-proton symporter (SUC5)

AT2G02860 sucrose transporter / sucrose-proton symporter (SUC3)

AT5G54800 glucose-6-phosphate/phosphate translocator

---

UNCATEGORIZED

---

AT2G34810 putative berberine bridge enzyme

AT4G15610 integral membrane family protein

AT5G57685 expressed protein

---

CONCLUSION OF TABLE
